1 **BCG-induced T cells shape *Mycobacterium tuberculosis* infection before reducing the**  
2 **bacterial burden<sup>1</sup>**

3

4 Jared L. Delahaye<sup>\*,†</sup>, Benjamin H. Gern<sup>\*</sup>, Sara B. Cohen<sup>\*</sup>, Courtney R. Plumlee<sup>\*</sup>, Shahin

5 Shafiani<sup>\*</sup>, Michael Y. Gerner<sup>†</sup>, Kevin B. Urdahl<sup>\*,†,‡,§</sup>

6

7 Running title: BCG shapes early immunity to Mtb

8

9 <sup>\*</sup>Seattle Children's Research Institute, Seattle, WA 98109, USA

10 <sup>†</sup>Department of Immunology, University of Washington School of Medicine, Seattle, WA

11 98109, USA

12 <sup>‡</sup>Department of Pediatrics, University of Washington School of Medicine, Seattle, WA 98109,

13 USA

14 <sup>§</sup>Corresponding author:

15 Phone: 206-884-3231 Fax: 206-884-3104 [kevin.urdahl@seattlechildrens.org](mailto:kevin.urdahl@seattlechildrens.org)

---

<sup>1</sup> This study was supported by the NIH grants 1R01AI134246 (K.B.U.), 1R01AI076327 (K.B.U.), U19AI135976 (K.B.U.), 1K22AI108628-01A1 (M.Y.G.), and T32GM007270-42 (J.L.D.).

16 **Abstract**

17 Growing evidence suggests the outcome of Mycobacterium tuberculosis (Mtb) infection is  
18 established rapidly after exposure, but how the current tuberculosis vaccine, BCG, impacts early  
19 immunity is poorly understood. Here we found that murine BCG immunization promotes a  
20 dramatic shift in infected cell types. While alveolar macrophages (AM) are the major infected  
21 cell for the first two weeks in unimmunized animals, BCG promotes the accelerated recruitment  
22 and infection of lung infiltrating phagocytes. Interestingly, this shift is dependent on CD4 T  
23 cells, yet does not require intrinsic recognition of antigen presented by infected AM. Mtb-  
24 specific T cells are first activated in lung regions devoid of infected cells, and these events  
25 precede vaccine-induced reduction of the bacterial burden, which occurs only after the co-  
26 localization of T cells and infected cells. Understanding how BCG alters early immune responses  
27 to Mtb provides new avenues to improve upon the immunity it confers.

## 28 **Introduction**

29 Bacillus Calmette-Guerin (BCG), the current tuberculosis (TB) vaccine, is effective at  
30 preventing disseminated disease in infants and young children (1). However, in most settings it  
31 provides little or no protection against adult pulmonary TB, the transmissible form of disease (2).  
32 Thus, despite widespread BCG immunization for nearly a century, *Mycobacterium tuberculosis*  
33 (Mtb) kills over 1.5 million people every year, more than any other single infectious agent (3). A  
34 better TB vaccine is urgently needed, but attaining this goal has been surprisingly difficult (4).  
35 Furthermore, because BCG reduces childhood mortality, a new vaccine will likely be added to a  
36 regimen that includes BCG, rather than replace it (5). To develop a strategy that builds upon  
37 BCG-mediated protection, we must first understand how BCG shapes immunity to Mtb,  
38 especially during early stages of infection when protective immunity is established.  
39 In mice, pulmonary Mtb burdens are equivalent between BCG-immunized and control mice until  
40 two weeks after infection (6). The failure of BCG to impact the Mtb burden during the first two  
41 weeks of infection has been attributed to the delayed arrival of T cells in the lung (7). However,  
42 BCG-specific T cells have been shown to be present in the lungs (8) of immunized mice even  
43 prior to Mtb challenge, indicating that impaired T cell recruitment cannot fully account for the  
44 inability of BCG to induce early protection.

45

46 In this study, we utilized the mouse model to investigate the impact of BCG on the early immune  
47 response to Mtb infection. Our findings reveal unexpected roles for CD4 T cells in: 1)  
48 accelerating the translocation of Mtb-infected alveolar macrophages (AM) into the lung  
49 interstitium; 2) recruiting monocyte-derived macrophages; and 3) promoting the early transfer of  
50 Mtb from AM to other phagocytes.

## 51 **Materials and Methods**

### 52 Mice

53 C57BL/6 and MHCII<sup>-/-</sup> mice were purchased from Jackson Laboratories (Bar Harbor, ME). All  
54 mice were housed in specific pathogen-free conditions at Seattle Children's Research Institute  
55 (SCRI). Experiments were performed in compliance with the SCRI Animal Care and Use  
56 Committee. Both male and female mice between the ages of 8-12 weeks were used.

57

### 58 BCG immunization

59 BCG-Pasteur was cultured in Middlebrook 7H9 broth at 37°C to an OD of 0.2-0.5. Bacteria was  
60 diluted in PBS and 10<sup>6</sup> CFU in 200ul was injected subcutaneously. After immunization, mice  
61 were rested for 8 weeks prior to Mtb infection.

62

### 63 Aerosol Infections

64 Infections were performed with wildtype H37Rv Mtb or H37Rv transformed with an mCherry  
65 reporter plasmid (9). Mice were enclosed in a Glas-Col aerosol infection chamber and 50-100  
66 CFU were deposited directly into the lungs.

67

### 68 Intratracheal and intravenous labeling

69 For intratracheal labeling, 30min prior to sacrifice, mice were anesthetized with 25% isoflurane  
70 in propylene glycol (Fisher Scientific) and 0.25ug of CD45.2 PE-Cy7 in 50ul of PBS was  
71 pipetted into the airway. For intravenous (i.v.) labeling, mice were anesthetized as above and  
72 infused with CD45.2 PE 10 min prior to sacrifice.

73

74 Lung cell isolation and antibody staining

75 Mouse lungs were homogenized in HEPES buffer with Liberase Blendzyme 3 (70ug/ml; Roche)  
76 and DNaseI (30ug/ml; Sigma-Aldrich) using a gentleMacs dissociator (Miltenyi Biotec). Lungs  
77 were incubated at 37°C for 30 min and then further homogenized with the gentleMacs. Cells  
78 were filtered through a 70um cell strainer and resuspended in RBC lysis buffer (Thermo) prior to  
79 a PBS wash. Cells were next incubated with 50ul Zombie Aqua viability dye (BioLegend) for  
80 10min at room temperature. Viability dye was quenched with 100ul of antibody cocktail in 50%  
81 FACS buffer (PBS containing 2.5% FBS and 0.1% NaN<sub>3</sub>)/50% Fc block buffer. Staining was  
82 performed for 20min at 4°C. Cells were washed with FACS buffer and fixed with 2%  
83 paraformaldehyde for 1hr prior to analysis on an LSRII flow cytometer (BD Biosciences). When  
84 stain sets contained tetramers, staining was performed for 1hr at room temperature. Ag85B and  
85 TB10.4 tetramers were obtained from the NIH Tetramer Core Facility.

86

87 Imaging

88 Mice were infected with H37Rv Mtb-mCherry and sacrificed at D10 and D14. Lungs were  
89 excised and submerged in BD Cytofix fixative solution diluted 1:3 with PBS for 24hr at 4°C.  
90 Lungs were washed 2x in PBS and dehydrated in 30% sucrose for 24hr prior to OCT embedding  
91 and rapid freezing in a methylbutane-dry ice slurry. 20um sections were stained overnight at  
92 room temperature and coverslipped with Fluoromount G mounting media (Southern Biotec).  
93 Images were acquired on a Leica SP8X confocal microscope, compensated for fluorophore  
94 spillover using LAS X (Leica), and analyzed with Imaris (Bitplane) and FlowJo (10).

95

96 T cell depletion

97 Mice were intraperitoneally injected with 400ug anti-CD4 GK1.5 or anti-CD8 2.43 (BioXcell) in  
98 PBS at D-1, D4, and D10 relative to infection.  
99 Bone marrow chimeras  
100 WT CD45.1/2 F1 mice were irradiated with 1000 rads and reconstituted with a 1:1 mixture of  
101 CD3-depleted (Miltenyi Biotec) CD45.1 B6.SJL:CD45.2 MHCII<sup>-/-</sup> bone marrow. At D56 post-  
102 reconstitution, mice were immunized with BCG.  
103  
104 Th1 polarization and adoptive transfers  
105 CD4 T cells from ESAT-6-specific (C7) (11) CD90.1<sup>+</sup> and OVA-specific (OTII) CD45.1<sup>+</sup> TCR  
106 transgenic mice were negatively enriched from spleens using EasySep magnetic microbeads  
107 (STEMCELL). T cells were Th1 polarized as follows:  $1.6 \times 10^6$  transgenic T cells were cultured  
108 with  $8.3 \times 10^6$  irradiated CD3<sup>-</sup> splenocytes. 5  $\mu$ g/ml of ESAT-6 or OVA peptide, 10 ng/ml IL-12,  
109 and 10  $\mu$ g/ml of anti-IL-4 antibody (R&D Systems) were added at D0. At D3, cells were split  
110 1:2, and 10 ng/ml IL-12 was added (R&D Systems). On D5, Th1 cells were i.v. injected into B6  
111 CD45.2<sup>+</sup> mice infected with Mtb 35 days prior.

## 112 **Results and Discussion**

### 113 **BCG vaccination promotes Mtb egress from AM early in infection.**

114 To understand the effects of BCG immunization on early Mtb infection, we examined the  
115 pulmonary Mtb burdens in BCG-immunized and control mice. Consistent with prior reports (6,  
116 7), lung burdens rose similarly in both groups through two weeks (Fig. 1A). At D15, the Mtb  
117 burden in the immunized group began to diverge and was reduced by one log by D21. These  
118 findings are consistent with the idea that BCG-induced immunity is not initiated until the third  
119 week of Mtb infection.

120

121 We recently found that Mtb first infects AM before disseminating to other cells including  
122 neutrophils (PMN) and monocyte-derived macrophages (MDM) (12). As tissue-resident and  
123 recruited phagocytes have been shown to differ in their capacity to curb Mtb replication (13, 14),  
124 we next asked whether immunization alters the proportions of cell types that harbor infection.  
125 Consistent with the similar Mtb burdens at D14, the numbers of cells harboring fluorescent Mtb  
126 (Mtb-mCherry) were also similar in each group (Fig. 1B). Surprisingly, even at this early phase,  
127 we observed a dramatic shift in the composition of infected cells. At D14, the proportion of Mtb-  
128 infected AM was significantly reduced in immunized animals compared to controls, with a  
129 corresponding increase in infected PMN and MDM (Fig. 1C-D). We confirmed these findings  
130 using confocal microscopy and quantitative histocytometry (10), wherein most Mtb was within  
131 SiglecF<sup>+</sup> AM at D14 in controls but within CD11b<sup>+</sup> SiglecF<sup>-</sup> cells (primarily PMN and MDM) in  
132 immunized mice (Fig. 1E-F). As Mtb dissemination to PMN and MDM requires translocation of  
133 infected AM to the lung interstitium (12), we next assessed whether this translocation was  
134 accelerated in immunized mice. Indeed, intratracheal antibody administration, which specifically

135 labels alveolar-localized cells (12), revealed significantly increased interstitial localization (label-  
136 negative) of infected AM in immunized mice at D14 (Fig. 1G). Finally, immunization  
137 significantly enhanced MDM recruitment to the lung at D14 (Fig. 1H), which was not observed  
138 at earlier time points or in Mtb-naïve mice (Supplemental Fig. 1A), suggesting that the  
139 accelerated recruitment of MDM in immunized mice begins between D10 and D14. Thus,  
140 although BCG does not impact the pulmonary Mtb burden in the first 2 weeks of infection, it  
141 accelerates the translocation of infected AM from alveoli to the lung interstitium, MDM  
142 recruitment, and Mtb dissemination to PMN and MDM.

143

144 **BCG accelerates the recruitment of antigen-specific T cells to the lung following Mtb**  
145 **infection.**

146 This unexpected impact of BCG on the early dynamics of infection led us to next investigate  
147 how immunization affects the kinetics of T cell recruitment to the lung. Before infection,  
148 antigen-specific CD4 (Ag85B) and CD8 (TB10.4) T cells could be identified in lung cell  
149 suspensions of immunized mice (Fig. 2A-C). Although ~25% of the Ag85B-specific cells were  
150 located in the lung parenchyma (as evidenced by their failure to stain with i.v. CD45 antibody),  
151 virtually all of the TB10.4-specific cells resided in the vasculature (Fig. 2D). Following  
152 infection, immunized mice had significantly more Ag85B-specific and TB10.4-specific cells in  
153 the lung parenchyma than controls as early as D10; by D14 they contained >5-fold more (Fig.  
154 2B-C). Thus, BCG induces a small population of lung-resident Mtb-specific CD4 T cells prior to  
155 infection. After infection, BCG accelerates the pulmonary recruitment of both CD4 and CD8  
156 Mtb-specific T cells, even before impacting the Mtb burden.

157



158 **CD4 T cells are required for the accelerated transfer of Mtb from AM to recruited**  
159 **phagocytes.**

160 Given the presence of lung-resident Mtb-specific T cells in immunized mice prior to infection,  
161 we next determined whether T cells play a role in the accelerated transfer of Mtb from AM to  
162 other myeloid cells. CD4 or CD8 T cells were depleted from immunized mice beginning 1 day  
163 prior to Mtb-mCherry infection and lung cells were assessed at D14 (Supplemental Fig. 1B-C).

164 In the absence of CD4 T cells, the accelerated transfer of Mtb from AM to PMN and MDM was  
165 partially reversed, whereas CD8 T cell depletion had no effect (Fig. 3A). Interestingly, the  
166 accelerated MDM recruitment (Fig. 1H) was also abolished by CD4 depletion (Fig. 3B). We next  
167 investigated whether direct recognition of Mtb-infected cells by CD4 T cells was required for the  
168 early dissemination out of the AM niche and whether MHCII<sup>-/-</sup> AM, which cannot present  
169 antigen to CD4 T cells, would retain Mtb longer than WT AM. WT:MHCII<sup>-/-</sup> mixed bone  
170 marrow chimeras were generated, BCG immunized, and infected with Mtb-mCherry. At D14,  
171 BCG induced the accelerated transfer of Mtb from AM to other myeloid cells irrespective of  
172 intrinsic MHCII expression (Fig. 3C). Taken together, BCG-induced CD4 T cells promote the  
173 early transfer of Mtb from AM to other myeloid cells in a process that does not require direct  
174 cognate interactions between T cells and Mtb-infected AM. Our finding that CD4 T cells  
175 promote MDM recruitment to the lung, thereby providing new bacterial targets, may help  
176 explain the increased proportion of infected MDM in immunized animals. This recruitment  
177 likely relates to T cell production of cytokines, such as IFN-gamma and TNF, which are known  
178 to trigger the release of chemokines that act on MDM, i.e., CCL2 and CXCL10 (15).

179

180 **BCG-induced CD4 T cells are initially activated distal to the site of Mtb infection.**

181 We next investigated the site of CD4 T cell activation during early Mtb infection using phospho-  
182 S6 (pS6) as a marker of TCR signaling, which is rapidly induced by TCR engagement, peaking  
183 at 4 h and resolving within 24 h (16). To confirm that pS6 expression by T cells is TCR-  
184 dependent in the context of Mtb-infected lungs, we demonstrated that pS6 was robustly  
185 expressed by adoptively transferred TCR transgenic Mtb-specific (ESAT-6; C7) CD4 T cells  
186 compared to irrelevant TCR transgenic T cells (OVA-specific) (Supplemental Fig. 2A). We next  
187 performed quantitative histocytometry to assess the intrapulmonary location of pS6 expression  
188 by CD4 T cells. At D10, there were significantly more pS6<sup>+</sup> CD4 T cells in the lungs of  
189 immunized mice compared to controls (Fig. 4A-B, Supplemental Fig. 2F). Surprisingly, few of  
190 these cells were located near infected cells (Fig. 4A, 4D, Supplemental Fig. 2B-E). Thus,  
191 although BCG induces early T cell recruitment and activation, at D10 this occurs primarily in  
192 uninfected areas of the lung, which may be due to Mtb antigenic export from infected to  
193 uninfected antigen-presenting cells (17). Taken together, the activation of BCG-induced CD4 T  
194 cells, which occurs distal to sites of infection, shapes immunity to Mtb challenge earlier than  
195 previously appreciated by facilitating the pulmonary recruitment of MDM and accelerating the  
196 transfer of Mtb from AM to other myeloid cells. This transfer likely influences the ability of the  
197 BCG-immunized host to control Mtb, as prior studies have shown that tissue-resident vs.  
198 recruited macrophages differ profoundly in their capacity to control Mtb replication (13, 14).  
199 Future studies are needed to elucidate the overall impact on protection because the settings in  
200 which distinct macrophage types mediate enhanced immunity remain unclear.  
201  
202 Interestingly, BCG-induced CD4 T cells only begin to curb Mtb replication at D14, when they  
203 finally co-localize with cells harboring Mtb, as evidenced by the identification of many pS6<sup>+</sup> T

204 cells at sites of infection compared to controls (Fig. 4C-D). This is consistent with the finding  
205 that optimal immunity against Mtb requires direct interactions between antigen-specific CD4 T  
206 cells and Mtb-infected cells (21). Why do T cells and Mtb-infected cells not co-localize earlier?  
207 The AM is the first cell type to become infected and remains the primary infected cell type for at  
208 least a week (12). During this time, the immune system appears largely unaware of the looming  
209 threat, as few MDM or PMN are recruited to the lung. The recent finding that AM infection is  
210 non-inflammatory and poorly induces chemokines may help explain the covert nature of early  
211 infection (Rothchild, A.C. et al. 2019. bioRxiv: 520791). Furthermore, the replication and spread  
212 within the AM population, a process associated with cell death of infected macrophages and  
213 phagocytosis by other macrophages, likely involves apoptosis, as necrotic cell death is associated  
214 with chemokine release and recruitment of MDM/PMN (19). Perhaps vaccine-induced T cells  
215 that express receptors for apoptotic “find-me” signals could co-localize with infected AM and  
216 exhibit earlier Mtb control compared to BCG-induced T cells, which may not express such  
217 receptors (20). Together, these results further our understanding of the features of pulmonary  
218 Mtb dissemination in the context of BCG, which could aid rational vaccine design to effectively  
219 complement BCG.

220 **Acknowledgements**

221 We thank P. Andersen, J. Woodworth, and R. Mortensen for critical feedback of the manuscript

222 as well as the flow cytometry core and vivarium staff for technical assistance.

## 223 References

- 224 1. Trunz, B. B., P. Fine, and C. Dye. 2006. Effect of BCG vaccination on childhood  
225 tuberculous meningitis and miliary tuberculosis worldwide: a meta-analysis and  
226 assessment of cost-effectiveness. *Lancet* 367: 1173-1180.
- 227 2. Mangtani, P., I. Abubakar, C. Ariti, R. Beynon, L. Pimpin, P. E. Fine, L. C. Rodrigues, P.  
228 G. Smith, M. Lipman, P. F. Whiting, and J. A. Sterne. 2014. Protection by BCG vaccine  
229 against tuberculosis: a systematic review of randomized controlled trials. *Clin Infect Dis*  
230 58: 470-480.
- 231 3. World Health Organization. 2018. *Global tuberculosis report 2018*. World Health  
232 Organization, Geneva.
- 233 4. Tameris, M. D., M. Hatherill, B. S. Landry, T. J. Scriba, M. A. Snowden, S. Lockhart, J.  
234 E. Shea, J. B. McClain, G. D. Hussey, W. A. Hanekom, H. Mahomed, H. McShane, and  
235 M. A. T. S. Team. 2013. Safety and efficacy of MVA85A, a new tuberculosis vaccine, in  
236 infants previously vaccinated with BCG: a randomised, placebo-controlled phase 2b trial.  
237 *Lancet* 381: 1021-1028.
- 238 5. Roth, A. E., L. G. Stensballe, M. L. Garly, and P. Aaby. 2006. Beneficial non-targeted  
239 effects of BCG--ethical implications for the coming introduction of new TB vaccines.  
240 *Tuberculosis (Edinb)* 86: 397-403.
- 241 6. Mollenkopf, H. J., M. Kursar, and S. H. Kaufmann. 2004. Immune response to  
242 postprimary tuberculosis in mice: *Mycobacterium tuberculosis* and *Mycobacterium bovis*  
243 bacille Calmette-Guerin induce equal protection. *J Infect Dis* 190: 588-597.
- 244 7. Ronan, E. O., L. N. Lee, P. C. Beverley, and E. Z. Tchilian. 2009. Immunization of mice  
245 with a recombinant adenovirus vaccine inhibits the early growth of *Mycobacterium*  
246 tuberculosis after infection. *PLoS One* 4: e8235.
- 247 8. Santosuosso, M., S. McCormick, X. Zhang, A. Zganiacz, and Z. Xing. 2006. Intranasal  
248 boosting with an adenovirus-vectored vaccine markedly enhances protection by  
249 parenteral *Mycobacterium bovis* BCG immunization against pulmonary tuberculosis.  
250 *Infect Immun* 74: 4634-4643.
- 251 9. Cosma, C. L., O. Humbert, and L. Ramakrishnan. 2004. Superinfecting mycobacteria  
252 home to established tuberculous granulomas. *Nat Immunol* 5: 828-835.
- 253 10. Gerner, M. Y., W. Kastentmuller, I. Ifrim, J. Kabat, and R. N. Germain. 2012. Histo-  
254 cytometry: a method for highly multiplex quantitative tissue imaging analysis applied to  
255 dendritic cell subset microanatomy in lymph nodes. *Immunity* 37: 364-376.
- 256 11. Gallegos, A. M., E. G. Pamer, and M. S. Glickman. 2008. Delayed protection by ESAT-  
257 6-specific effector CD4+ T cells after airborne *M. tuberculosis* infection. *J Exp Med* 205:  
258 2359-2368.
- 259 12. Cohen, S. B., B. H. Gern, J. L. Delahaye, K. N. Adams, C. R. Plumlee, J. K. Winkler, D.  
260 R. Sherman, M. Y. Gerner, and K. B. Urdahl. 2018. Alveolar Macrophages Provide an  
261 Early *Mycobacterium tuberculosis* Niche and Initiate Dissemination. *Cell Host Microbe*  
262 24: 439-446 e434.
- 263 13. Huang, L., E. V. Nazarova, S. Tan, Y. Liu, and D. G. Russell. 2018. Growth of  
264 *Mycobacterium tuberculosis* in vivo segregates with host macrophage metabolism and  
265 ontogeny. *J Exp Med* 215: 1135-1152.

- 266 14. Cambier, C. J., K. K. Takaki, R. P. Larson, R. E. Hernandez, D. M. Tobin, K. B. Urdahl,  
267 C. L. Cosma, and L. Ramakrishnan. 2014. Mycobacteria manipulate macrophage  
268 recruitment through coordinated use of membrane lipids. *Nature* 505: 218-222.
- 269 15. Murray, H. W., A. D. Luster, H. Zheng, and X. Ma. 2017. Gamma Interferon-Regulated  
270 Chemokines in *Leishmania donovani* Infection in the Liver. *Infect Immun* 85.
- 271 16. Sauer, S., L. Bruno, A. Hertweck, D. Finlay, M. Leleu, M. Spivakov, Z. A. Knight, B. S.  
272 Cobb, D. Cantrell, E. O'Connor, K. M. Shokat, A. G. Fisher, and M. Merckenschlager.  
273 2008. T cell receptor signaling controls Foxp3 expression via PI3K, Akt, and mTOR.  
274 *Proc Natl Acad Sci U S A* 105: 7797-7802.
- 275 17. Srivastava, S., P. S. Grace, and J. D. Ernst. 2016. Antigen Export Reduces Antigen  
276 Presentation and Limits T Cell Control of *M. tuberculosis*. *Cell Host Microbe* 19: 44-54.
- 277 18. Srivastava, S., and J. D. Ernst. 2013. Cutting edge: Direct recognition of infected cells by  
278 CD4 T cells is required for control of intracellular *Mycobacterium tuberculosis* in vivo. *J*  
279 *Immunol* 191: 1016-1020.
- 280 19. Almeida, F. M., T. L. Ventura, E. P. Amaral, S. C. Ribeiro, S. D. Calixto, M. R.  
281 Manhaes, A. L. Rezende, G. S. Souzal, I. S. de Carvalho, E. C. Silva, J. A. Silva, E. C.  
282 Carvalho, A. L. Kritski, and E. B. Lasunskiaia. 2017. Hypervirulent *Mycobacterium*  
283 tuberculosis strain triggers necrotic lung pathology associated with enhanced recruitment  
284 of neutrophils in resistant C57BL/6 mice. *PLoS One* 12: e0173715.
- 285 20. Hochreiter-Hufford, A., and K. S. Ravichandran. 2013. Clearing the dead: apoptotic cell  
286 sensing, recognition, engulfment, and digestion. *Cold Spring Harb Perspect Biol* 5:  
287 a008748.
- 288 21. Muller, A. J., O. Filipe-Santos, G. Eberl, T. Aebischer, G. F. Spath, and P. Bousso. 2012.  
289 CD4<sup>+</sup> T cells rely on a cytokine gradient to control intracellular pathogens beyond sites  
290 of antigen presentation. *Immunity* 37: 147-157.
- 291

## 292 **Figure legends**

293 Figure 1: BCG vaccination promotes Mtb egress from AM early in infection.

294 (A) Mtb burden in the lungs of mice that did or did not receive BCG (n=4  
295 mice/group/timepoint). (B) Total number of mCherry<sup>+</sup> lung cells at D14 by flow cytometry (n=4-  
296 5 mice/group). (C) Representative flow plot of the proportion of mCherry<sup>+</sup> cells identified as  
297 CD11c<sup>+</sup> Siglec-F<sup>+</sup>AMs at D14. (D) Composition of mCherry<sup>+</sup> lung cells (AM: CD11c<sup>+</sup> Siglec-F<sup>+</sup>,  
298 PMN: CD11b<sup>+</sup> Ly6G<sup>+</sup>, MDM: CD11b<sup>+</sup> CD64<sup>+</sup>) at D14 by flow cytometry (n=4-5 mice/group).  
299 (E) Representative images of the lung at D14 showing infected Siglec F<sup>+</sup> AM (orange arrows)  
300 and infected Siglec F<sup>-</sup> CD11b<sup>+</sup> cells (white arrows). (F) Composition of mCherry<sup>+</sup> lung cells at  
301 D14 by quantitative histocytometry (n=6-8 infectious foci from 2 mice/group). (G) Ratio of  
302 airway label positive infected AM at D14 (n=5 mice/group). (H) Number of MDM in the lung at  
303 D14 by flow cytometry (n=4-5 mice/group). Single-group comparisons were performed by  
304 unpaired t test. Data are presented as mean ± SEM. \*p < 0.05, \*\*p < 0.01, \*\*\*\*p < 0.0001. All  
305 experiments were performed at least 2–3 times.

306

307 Figure 2: BCG accelerates the recruitment of antigen-specific T cells to the lung following Mtb  
308 infection.

309 Time course of the number of tetramer-specific T cells in the lung. Mice received i.v. CD45  
310 antibody prior to sacrifice. (A) Representative flow plots showing Ag85B-specific (CD3<sup>+</sup>CD4<sup>+</sup>)  
311 and TB10.4-specific (CD3<sup>+</sup>CD8<sup>+</sup>) T cells in the lungs of control and immunized mice prior to  
312 infection. The tetramer<sup>+</sup> cells in immunized mice are further gated on CD45 i.v.<sup>-</sup> to determine the  
313 proportion in the lung parenchyma. Total number of i.v.<sup>-</sup> Ag85B-specific (B) and TB10.4-  
314 specific (C) cells in the lungs of control and immunized mice (n=3-5 mice/group/timepoint). (D)

315 Proportion of tetramer<sup>+</sup> cells that are i.v.<sup>-</sup> in immunized mice at D0 (n=5 mice/group). Single-  
316 group comparisons were performed by unpaired t test. Data are presented as mean ± SEM. \*p <  
317 0.05, \*\*p < 0.01, \*\*\*p < 0.001. All experiments were performed at least twice.

318

319 Figure 3: CD4 T cells are required for the accelerated transfer of Mtb from AM to recruited  
320 phagocytes.

321 (A) Composition of mCherry<sup>+</sup> cells in control, immunized, and T cell-depleted immunized mice  
322 at D14 (n=4 mice/group). (B) Total number of MDM as in (A). (C) Composition of WT (left)  
323 and KO (right) mCherry<sup>+</sup> cells in control and immunized mixed bone marrow chimeras at D14  
324 (n=3-4 mice/group). Single-group comparisons were performed by unpaired t test (C) and  
325 multiple-group comparisons by one-way ANOVA (A and B). Data are presented as mean ±  
326 SEM. \*p < 0.05, \*\*p < 0.01, \*\*\*p < 0.001, \*\*\*\*p < 0.0001. All experiments were performed at  
327 least twice.

328

329 Figure 4: BCG-induced CD4 T cells are initially activated distal to the site of Mtb infection.

330 Quantitative histocytometry was used to identify the location of CD4 T cells (blue) and pS6<sup>+</sup>  
331 CD4 T cells (green) relative to infected cells (red) in lung sections at D10 (A) and sites of  
332 infection at D14 (C). (B) Number of pS6<sup>+</sup> CD4 T cells per mm<sup>2</sup> of lung at D10 as determined by  
333 quantitative histocytometry (n=2-3 mice/group). (D) Number of pS6<sup>+</sup> CD4 T cells within 80 μm  
334 of an infected cell (n=2 mice/group). This cutoff was based on the limit of IFNγ diffusion within  
335 tissue (21). Single-group comparisons were performed by unpaired t test. Data are presented as  
336 mean ± SEM. \*p < 0.05, \*\*p < 0.01.



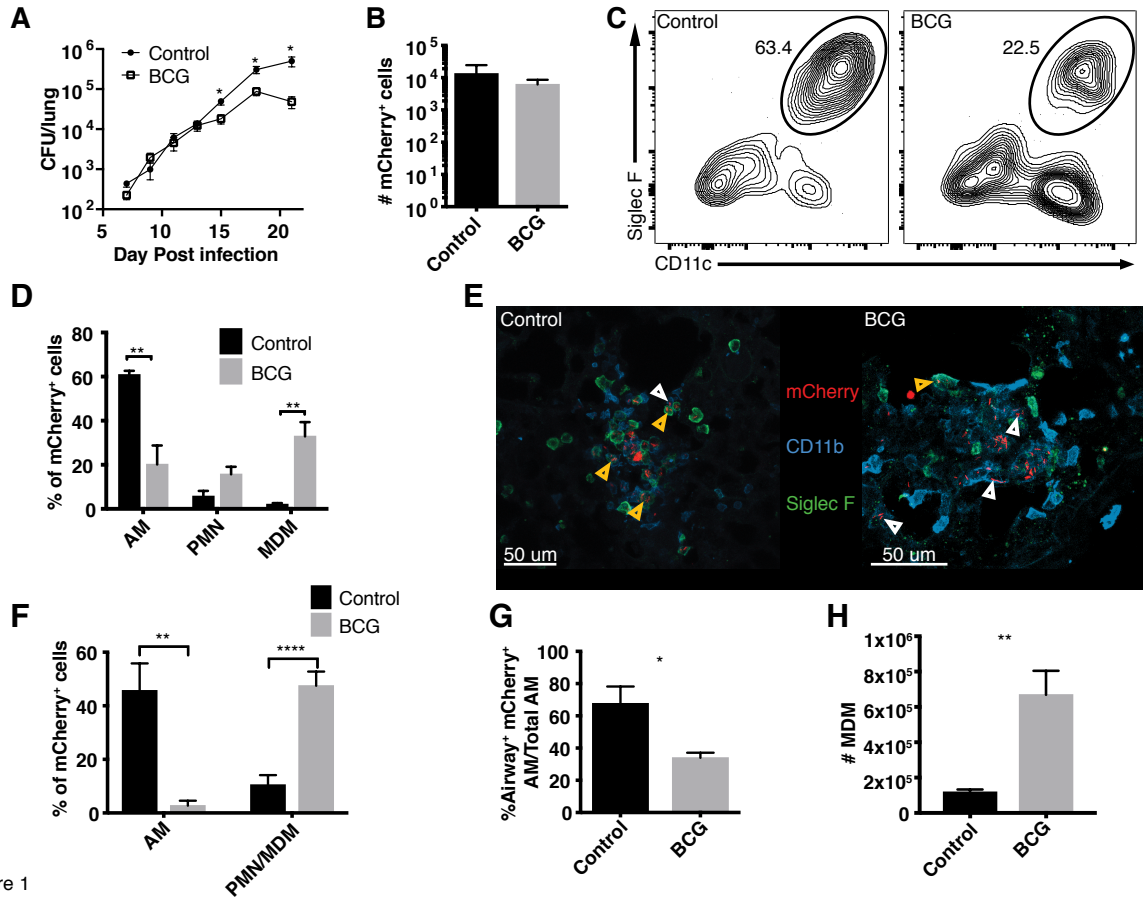

Figure 1

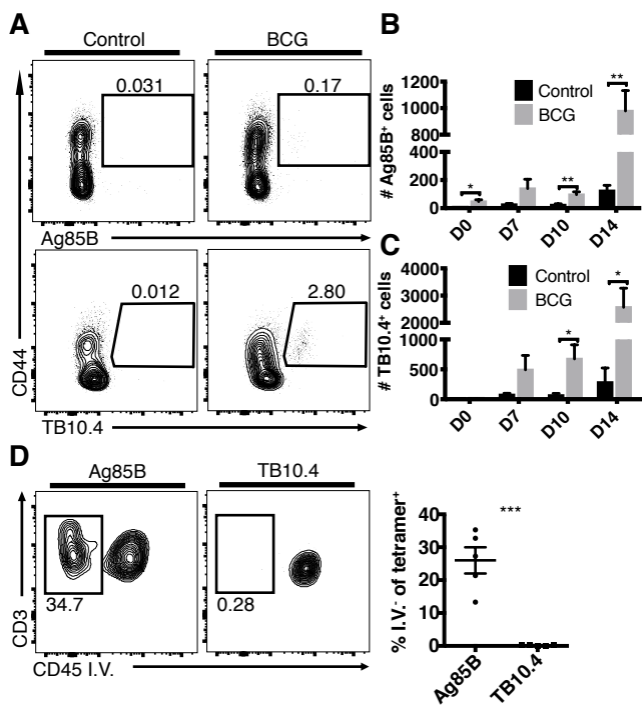

Figure 2

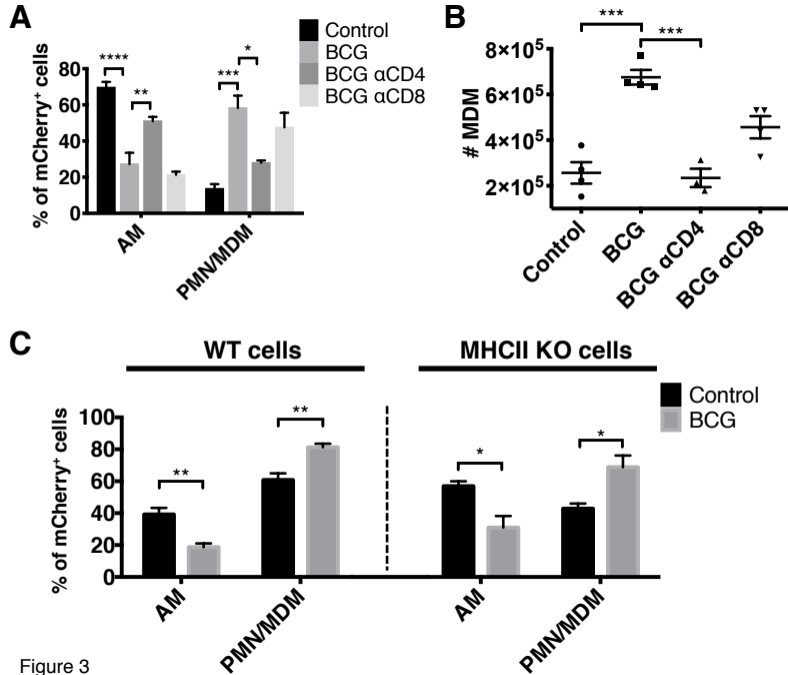

Figure 3

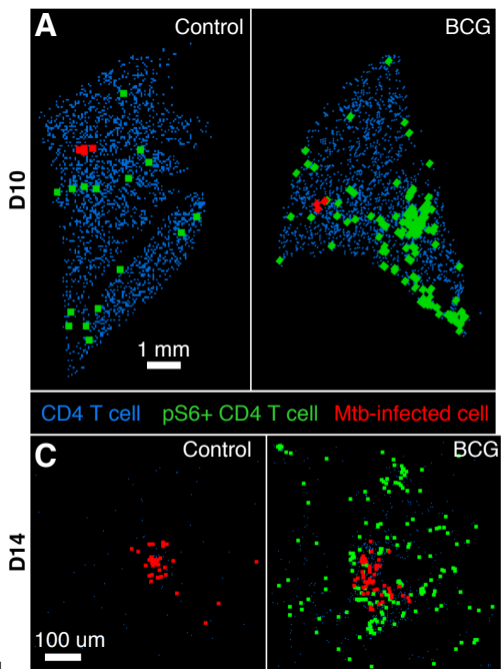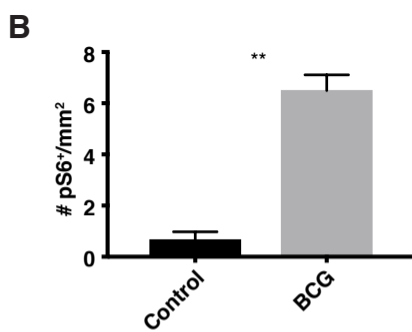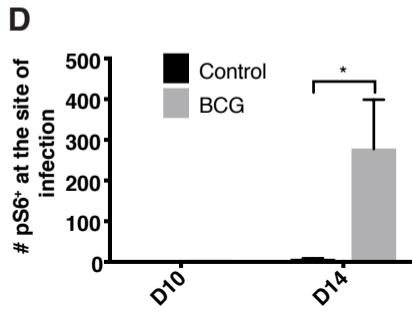

Figure 4
