# Supplementary material for: BCG-induced T cells shape Mycobacterium tuberculosis infection before reducing the bacterial burden
Source: bioRxiv or medRxiv preprint supplement (doi:10.1101/590554), 2019-04-04
Supplement: Supplementary file [file media-1.pdf]

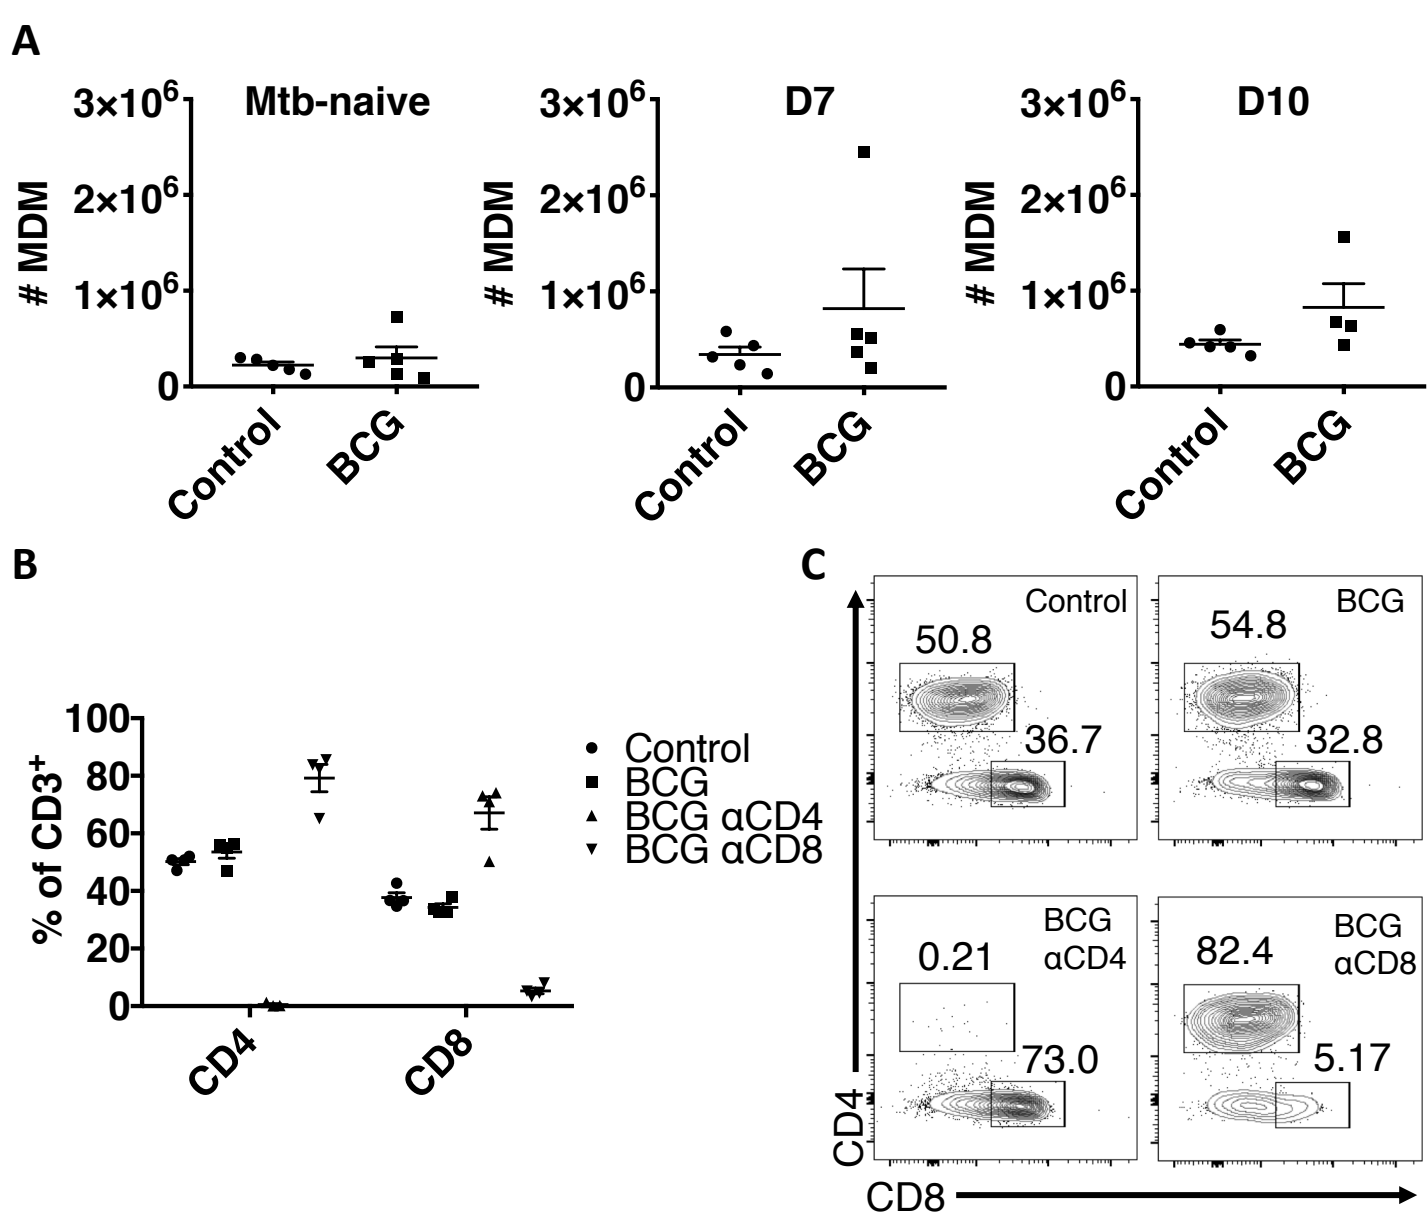

Supplemental Figure 1: Kinetics of MDM recruitment and T cell depletion efficacy. (A) Quantification of the number of MDM in the lungs of animals prior to and following Mtb infection as determined by flow cytometry ( $n=4-5$  mice/group). Single-group comparisons were performed by unpaired t test. Data are presented as mean  $\pm$  SEM. (B) Proportion of CD4 and CD8 T cells in control, BCG, and BCG animals that were treated with CD4 or CD8-depleting antibodies ( $n=4$  mice/group). (C) Representative flow plots showing CD4 and CD8 T cells.

**A**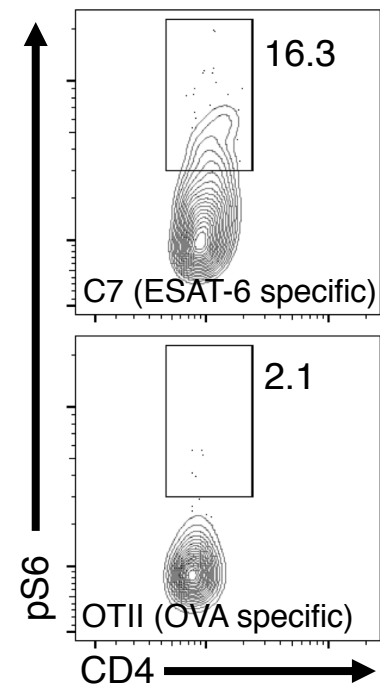**F**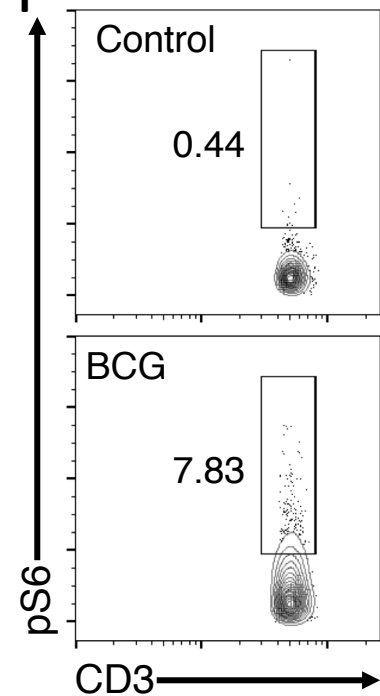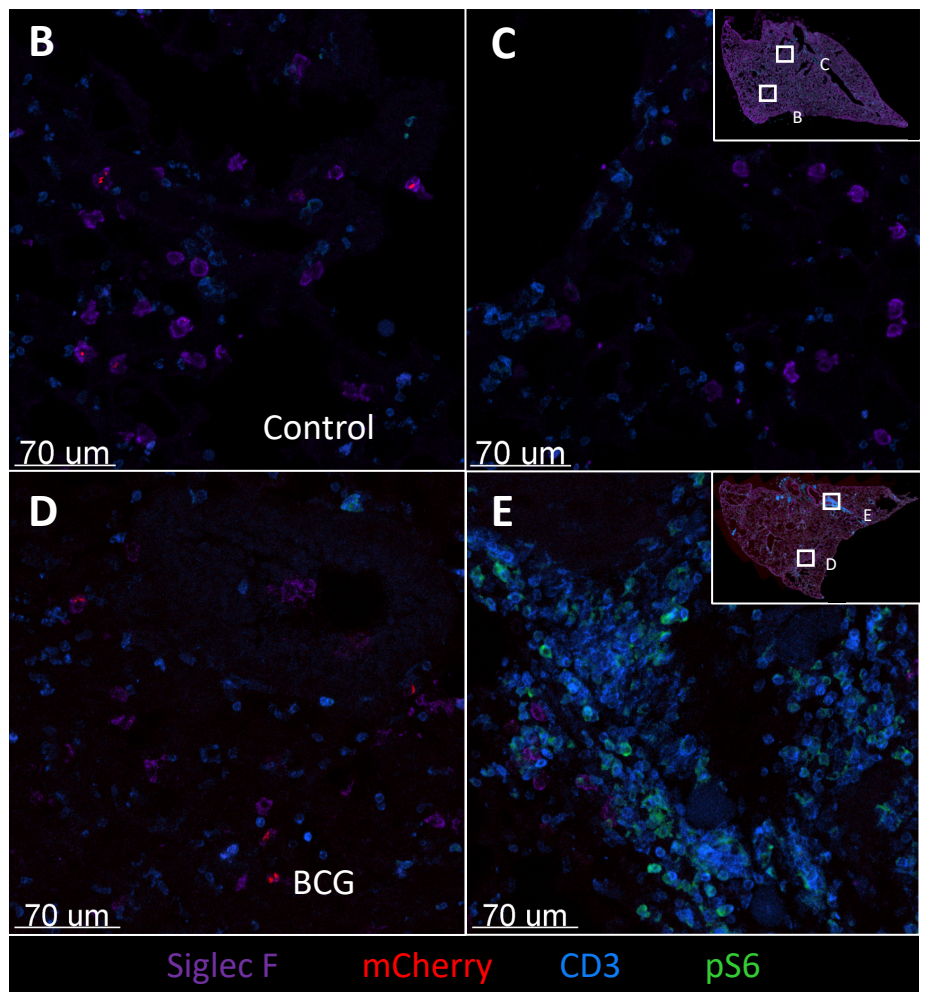

Supplemental Figure 2: Imaging and quantitative histocytometry of Mtb-infected lungs.

(A) Mtb-specific C7 and OVA-specific OTII CD4 T cells were stimulated *in vitro* to generate Th1 cells. These were then co-transferred into Mtb infected animals. Quantitative histocytometry was used to determine pS6<sup>+</sup> C7 and OTII cells. Representative immunofluorescence images of control (B and C) and BCG-immunized (D and E) lungs at D10. Inset shows the areas of the lungs where mCherry<sup>+</sup> infected cells were found (B and D), as well as areas distal to the infection (C and E). (F) Representative flow plot showing the proportion of pS6<sup>+</sup> CD4 T cells from control and vaccinated lungs at D10.
